# Supplementary material
Source: HighWire-hosted journal article supplement (http://www.qdcxjkg.com/highwire/filestream/113772/field_highwire_adjunct_files/0/switch_study_appendix_i-v_doc_test3.pdf)
Supplement: switch_study_appendix_i-v_doc_test3.pdf [file switch_study_appendix_i-v_doc_test3.pdf]

## Appendix I. In- and exclusion criteria

### Inclusion criteria

1. Age  $\geq$  18 years.
2. Community acquired pneumonia, defined as:
  - a. A new or progressive infiltrate on a chest X-ray **AND**
  - b.  $\geq$  2 of the following criteria:
    - Cough
    - Sputum production
    - Dyspnoea
    - Rectal temperature  $> 38^{\circ}\text{C}$  or  $< 36.1^{\circ}\text{C}$
    - Auscultator findings consistent with pneumonia
    - Leucocytosis ( $>10.000/\text{mm}^3$ , or  $>15\%$  bands)
    - C-reactive protein  $>30$  mg/L **AND**
  - c. No hospital acquired pneumonia **nor** health care associated pneumonia\*\*
3. Admission to internal medicine or lung disease ward.
4. Intravenous treatment with antibiotics.
5. Severe pneumonia defined as: PSI of  $>90$  or CURB-65  $>2$ , or pneumonia being the reason of admission.

### Exclusion criteria

1. ICU admission with intravenous antibiotics.
2. Infections other than pneumonia that need immediate treatment with intravenous agents.

3. Cystic fibrosis or history of lung transplantation.

4. Neutropenia (leukocyte count  $<0,5 \cdot 10^9 / l$ ) or/and HIV infection with a CD4 count  $<200/mm^3$

*\* Hospital acquired pneumonia defined as hospital admission  $> 48$  hours in the two weeks prior to inclusion.*

*\*\* Health care associated pneumonia: non-hospitalized patient with extensive healthcare contact, as defined by one or more of the following:*

*a. Intravenous therapy, wound care, or intravenous chemotherapy within the prior 30 days.*

*b. Residence in a nursing home or another long term care facility.*

*c. Hospitalization in an acute care hospital for  $\geq 2$  days within the prior 90 days.*

*d. Attendance to a hospital or hemodialysis clinic within the prior 30 days.*

## Appendix II. Questions in the patient specific questionnaire

| Nr.                                | Subject                                                                                          | Data                       |
|------------------------------------|--------------------------------------------------------------------------------------------------|----------------------------|
| 1.                                 | Is the patient clinically stable according to the resident?                                      | Yes/No, because...         |
| 2.                                 | Is the patient able to take oral medication?                                                     | Yes/No, because...         |
| 3.                                 | Does the patient receive antibiotics intravenously or orally?                                    | Yes/No, because...         |
| 4.                                 | What factors are of influence on your choice to administer the antibiotics intravenously/orally? |                            |
|                                    | <b>Factors</b>                                                                                   | <b>Qualitative answers</b> |
|                                    | Medical specialist (supervisor)                                                                  |                            |
|                                    | Resident                                                                                         |                            |
|                                    | Nursing staff                                                                                    |                            |
|                                    | Patient                                                                                          |                            |
|                                    | Other hospital staff                                                                             |                            |
|                                    | Organisation                                                                                     |                            |
|                                    | Other                                                                                            |                            |
| <b><u>End of questionnaire</u></b> |                                                                                                  |                            |

### Appendix III. Questions in the physician specific questionnaire

| Nr.                                                         | Question                                                                                                                                                                                                                                                                                                                                                                                                                                                                                                                                                   |
|-------------------------------------------------------------|------------------------------------------------------------------------------------------------------------------------------------------------------------------------------------------------------------------------------------------------------------------------------------------------------------------------------------------------------------------------------------------------------------------------------------------------------------------------------------------------------------------------------------------------------------|
| <b>Physician</b>                                            |                                                                                                                                                                                                                                                                                                                                                                                                                                                                                                                                                            |
| 1.                                                          | Name and job description.                                                                                                                                                                                                                                                                                                                                                                                                                                                                                                                                  |
| 2.                                                          | Hospital, department.                                                                                                                                                                                                                                                                                                                                                                                                                                                                                                                                      |
| 3.                                                          | Residents: years of working experience as a resident.<br><br>Medical specialists: centre of training.                                                                                                                                                                                                                                                                                                                                                                                                                                                      |
| 4a.                                                         | Years of research experience (if applicable).                                                                                                                                                                                                                                                                                                                                                                                                                                                                                                              |
| 4b.                                                         | Years of experience as a medical specialist (if applicable).                                                                                                                                                                                                                                                                                                                                                                                                                                                                                               |
| <b>Antibiotic treatment in community acquired pneumonia</b> |                                                                                                                                                                                                                                                                                                                                                                                                                                                                                                                                                            |
| 5.                                                          | Theoretically speaking, what if the average patient with a CAP was admitted and intravenous antibiotics were administered, what would be an ideal time to switch to oral antibiotics in your perspective?                                                                                                                                                                                                                                                                                                                                                  |
| 6.                                                          | Where did you pick this up?                                                                                                                                                                                                                                                                                                                                                                                                                                                                                                                                |
| 7.                                                          | <p>What factors are of influence on the timing of the switch from intravenous antibiotics to oral agents in patients with severe CAP in clinical practice? E.g. what factors might make you deviate from the ideal timing mentioned in question 5? When formulating your answer think of factors on the following levels:</p> <ul style="list-style-type: none"> <li>- Medical specialist (supervisor)</li> <li>- Resident</li> <li>- Nursing staff</li> <li>- Patient</li> <li>- Other hospital staff</li> <li>- Organisation</li> <li>- Other</li> </ul> |
| 8.                                                          | In your working environment, are there clear guidelines on the timing of the switch from intravenous antibiotics to oral agents in patients with (severe) CAP?                                                                                                                                                                                                                                                                                                                                                                                             |
| 9.                                                          | If yes, which guidelines are they?                                                                                                                                                                                                                                                                                                                                                                                                                                                                                                                         |
| 10.                                                         | Do you know if there are any published research results on this subject?                                                                                                                                                                                                                                                                                                                                                                                                                                                                                   |

**Feedback**

**11.** What form of feedback is most efficient to your opinion?

- Presentation (lecture)
- Presentation (interactive)
- Walk through presentation on the computer
- Interactive computer program
- Reminder (pocketsize laminated card)
- Reminder (on desktop personal computer)
- Reminder (on patients chart)
- Reminder (through nursing staff)
- Reminder (through pharmacy)
- Other, namely...

**Additional remarks:**

**End of questionnaire**

**Appendix IV. Characteristics of patients in whom a switch was possible on day 3 (n=69)\*\*\*\***

|                                         | Total*         | Timing switch* |                |                         |
|-----------------------------------------|----------------|----------------|----------------|-------------------------|
|                                         |                | ≤ day 3        | > day 3        | p-value (95% CI)        |
|                                         | 69 (100)       | 42 (60.9)      | 27 (39.1)      |                         |
| <b>Age</b>                              | 63.8 (18.7)    | 61.9 (20.5)    | 66.7 (15.6)    | 0.294 (-14.094 - 4.327) |
| <b>Female</b>                           | 30 (43.4)      | 16 (38.1)      | 14 (51.9)      | 0.261                   |
| <b>Comorbidity (≥1)</b>                 | 39 (56.5)      | 24 (57.1)      | 15 (55.6)      | 0.897                   |
| Malignancy**                            | 9 (13.0)       | -              | -              | -                       |
| Liver disease**                         | 0              | -              | -              | -                       |
| Congestive heart failure**              | 6 (8.7)        | -              | -              | -                       |
| Cerebrovascular disease**               | 5 (7.2)        | -              | -              | -                       |
| Kidney disease**                        | 5 (7.2)        | -              | -              | -                       |
| Lung disease                            | 22 (31.9)      | 13 (31.0)      | 9 (33.3)       | 0.836                   |
| Other relevant comorbidities            | 15 (21.7)      | 8 (19.0)       | 7 (26.0)       | 0.499                   |
| <b>CURB-65 at presentation (min)</b>    | 1.2 (± 1.0)    | 1.05 (± 0.9)   | 1.48 (± 1.0)   | 0.073 (-0.910 - 0.042)  |
| <b>Fine score at presentation (min)</b> | 79.0 (± 28.2)  | 76.2 (± 26.7)  | 83.5 (± 30.4)  | 0.299 (-21.186 - 6.604) |
| <b>Follow up</b>                        |                |                |                |                         |
| <b>Clinical parameters (day 3)***</b>   |                |                |                |                         |
| Temperature (°C)                        | 36.8 (± 0.5)   | 36.7(± 0.5)    | 36.9 (± 0.5)   | 0.090 (-0.4814- 0.0357) |
| Oxygen saturation (%)                   | 95.9 (± 1.9)   | 95.5(± 1.5)    | 96.2 (± 2.2)   | 0.151 (-1.759 - 0.279)  |
| Oxygen administered (yes)               | 17 (25.0)      | 4 (14.3)       | 6 (25.0)       | 0.483                   |
| Respiratory rate (per minute)           | 18.5 (± 2.1)   | 18.5 (± 1.5)   | 18.5 (± 2.5)   | 1.000 (-2.141 - 2.141)  |
| Blood pressure (mmHg)                   | -              | -              | -              | -                       |
| Diastolic                               | 75.0 (± 10.4)  | 74.6 (± 10.7)  | 75.5 (± 10.2)  | 0.759 (-6.507 - 4.774)  |
| Systolic                                | 133.6 (± 18.8) | 137.2 (± 19.7) | 129.5 (± 17.1) | 0.124 (-2.192 - 17.736) |
| Heart rate (BPM)                        | 78.3 (± 9.3)   | 77.5 (± 10.1)  | 79.4 (± 8.5)   | 0.458 (-6.919 - 3.160)  |

|                                     |             |             |             |                                |
|-------------------------------------|-------------|-------------|-------------|--------------------------------|
| <b>Length of hospital stay</b>      | 5,8 (± 3,4) | 4,3 (± 2,6) | 7,9 (± 3,3) | <b>0.000 (-5.036 - -2.182)</b> |
| <b>Readmission</b> (within 28 days) | 5 (7.4)     | 3 (7.3)     | 2 (4.9)     | 0.989                          |
| <b>Mortality</b> (within 28 days)   | 0           | -           | -           | -                              |

\* n (%) or mean (± standard deviation) using the Independent-samples T test for ratio variables and the Chi-square or Fishers exact test for nominal variables.

\*\* As defined in the Fine score.

\*\*\* Missing data were not used in the calculation

\*\*\*\*One patient died on day three and was left out of the comparison "day 3" and "follow up"

**Appendix V. Perceived barriers to an early switch strategy in theory (physician specific questionnaire**

**(n=97). Answers provided by 3 physicians or less.**

| <b>Factors</b>                      |                                                            |                   |
|-------------------------------------|------------------------------------------------------------|-------------------|
| <b>Category</b>                     | <b>Qualitative answers</b>                                 | <b>Frequency*</b> |
| <b>Physician factors</b>            | Limited knowledge of the available evidence                | 1                 |
|                                     | Physician has not treated this patient for long            | 2                 |
| <b>Patient factors</b>              | <b>Patient characteristics</b>                             |                   |
|                                     | <b>Clinical course</b>                                     |                   |
|                                     | Not clinically stable (unspecified)                        | 2                 |
|                                     | Signs of sepsis                                            | 2                 |
|                                     | Coughing                                                   | 1                 |
|                                     | Recurrent pneumonia                                        | 2                 |
|                                     | Biological availability not secure (by clinical judgement) | 1                 |
|                                     | Purulent sputum                                            | 1                 |
|                                     | Poor lung function                                         | 1                 |
|                                     | High Fine score                                            | 1                 |
| <b>Other hospital staff factors</b> | Delay due to nurses breaks and other activities            | 3                 |
|                                     | Only a limited number of measurements is known             | 1                 |
| <b>Organisation factors</b>         | Delay order-delivery medication                            | 3                 |
|                                     | Delay by specific dosing times on ward                     | 2                 |
|                                     | Work pressure delays communication physician-nurse         | 1                 |
|                                     | Nurses are afraid to switch to oral agents                 | 1                 |
|                                     | Delay due to administration when prescribing manually      | 1                 |
|                                     | Pro-activity nurses is limited                             | 1                 |
| <b>Other</b>                        | <b>Antibiotics</b>                                         |                   |
|                                     | Various oral agents failed in primary care                 | 1                 |
|                                     | Amoxicillin and Augmentin are absorbed better per IV       | 1                 |

|  |                                               |   |
|--|-----------------------------------------------|---|
|  | Initially unknown focus                       | 1 |
|  | <b>Microbiology</b>                           |   |
|  | Causative pathogen is unknown                 | 3 |
|  | Causative pathogen is viral (eg H. Influenza) | 2 |
|  | Positive blood culture                        | 1 |
|  | <b>Admission related/ other</b>               |   |
|  | Needs one more day of (IV) antibiotics        | 1 |
|  | Bed bound patient                             | 1 |

*\* Number of physicians that provided this answer.*
